# Supplementary material
Source: MDPI journal article supplement (https://www.mdpi.com/2411-9660/6/5/79)
Supplement: s1 [file s1]

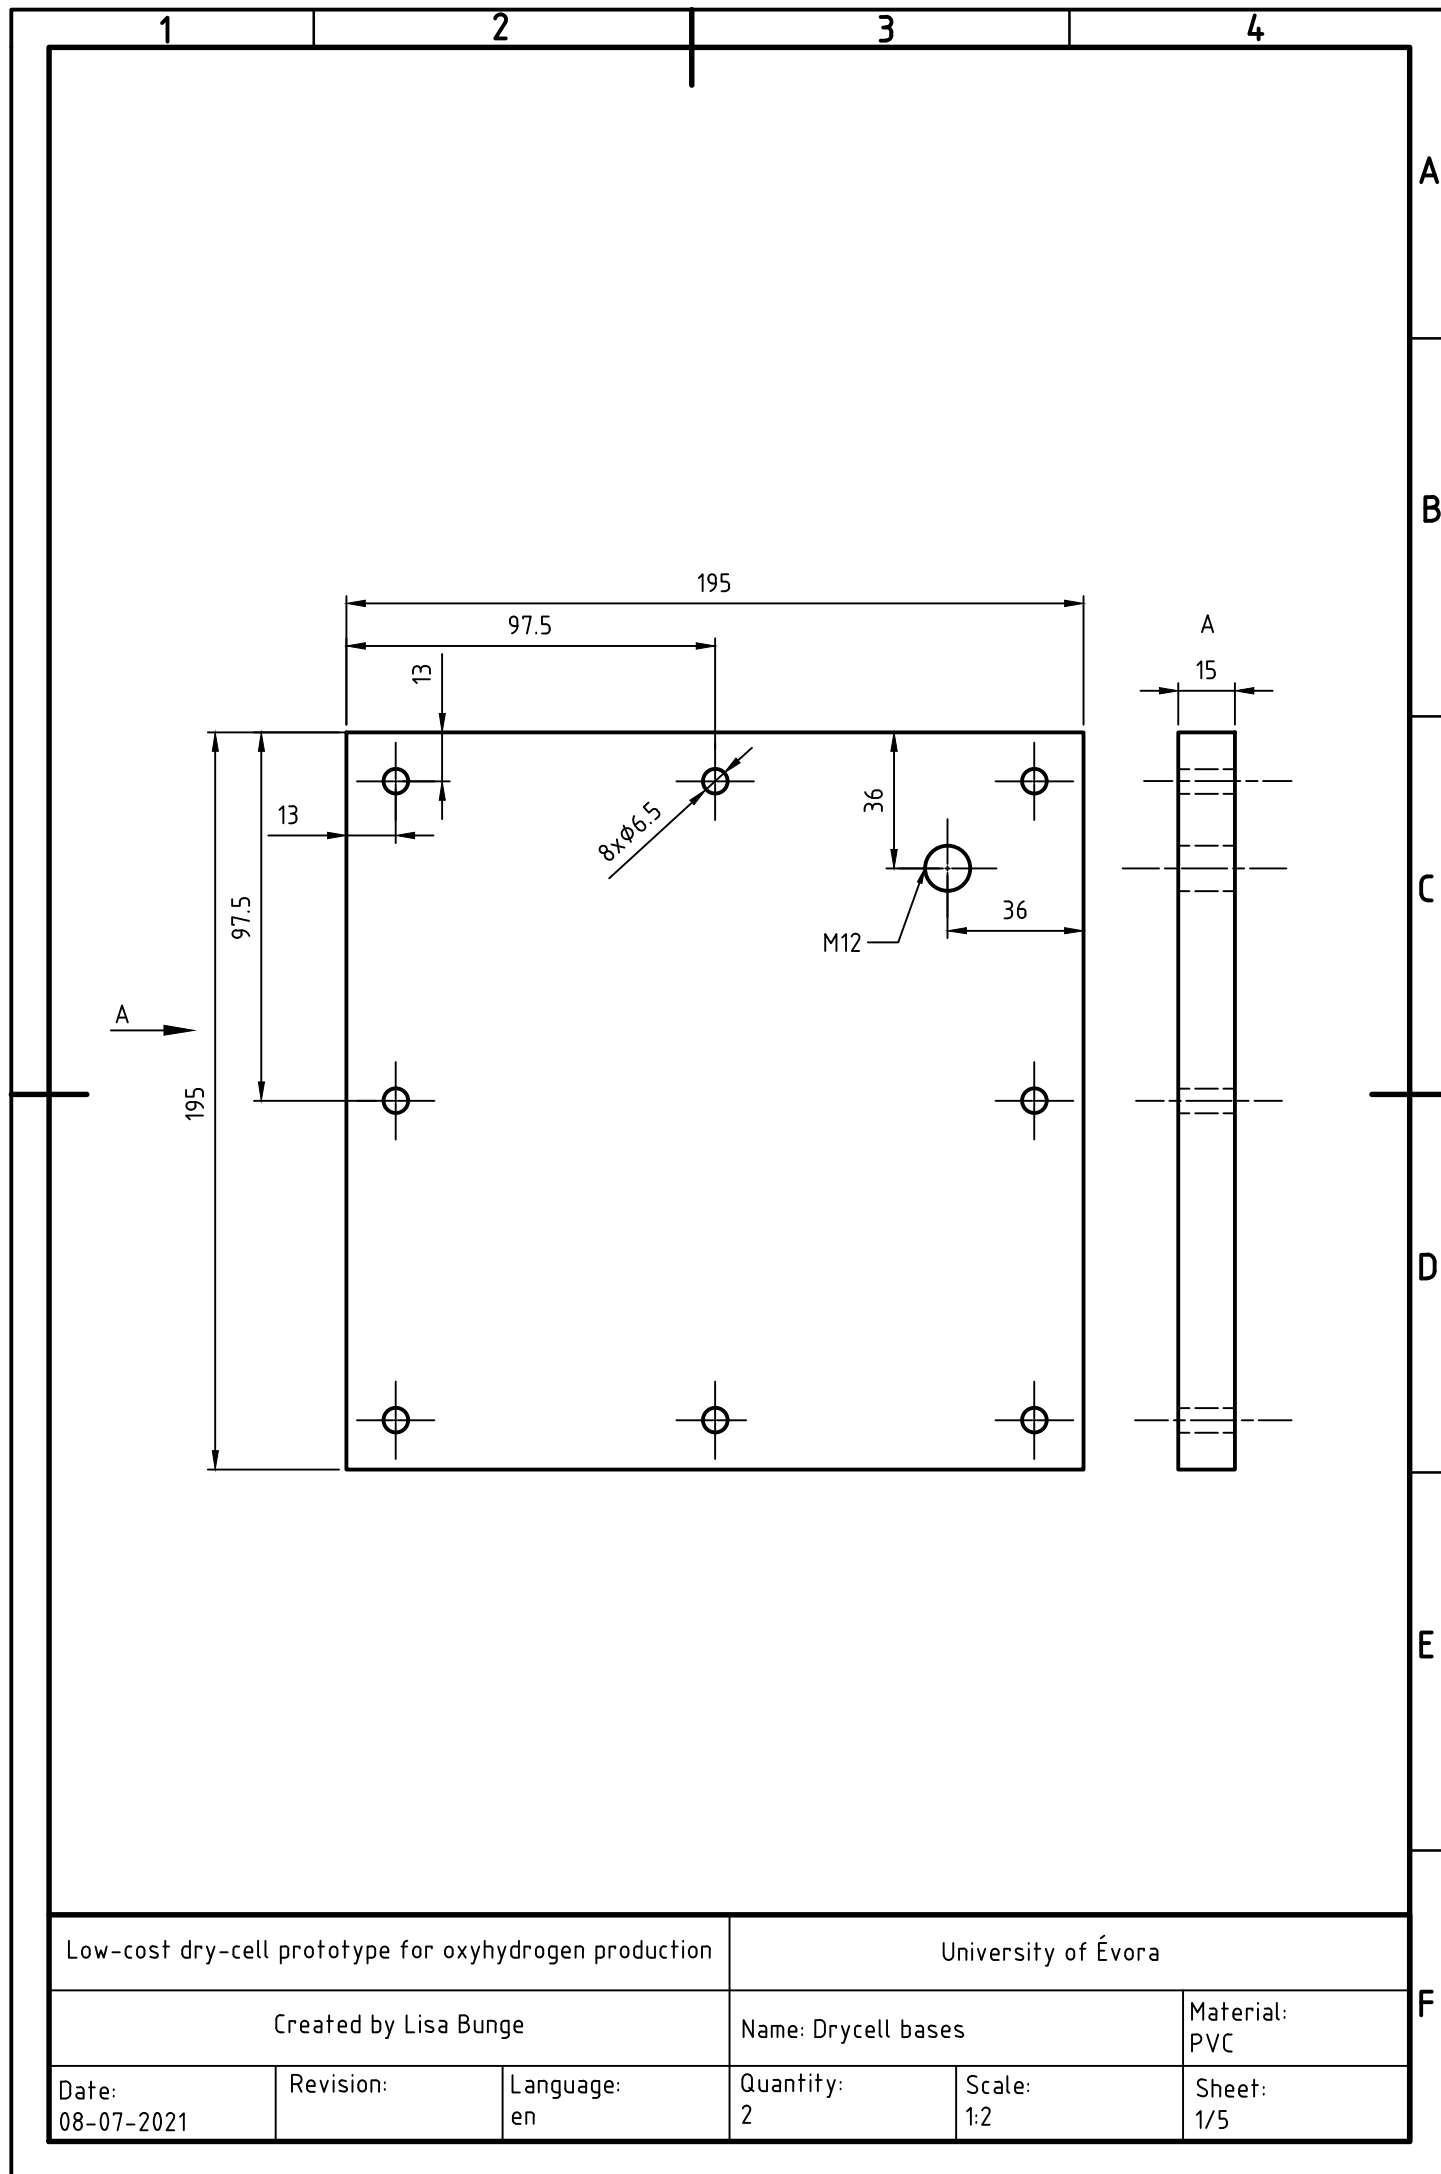

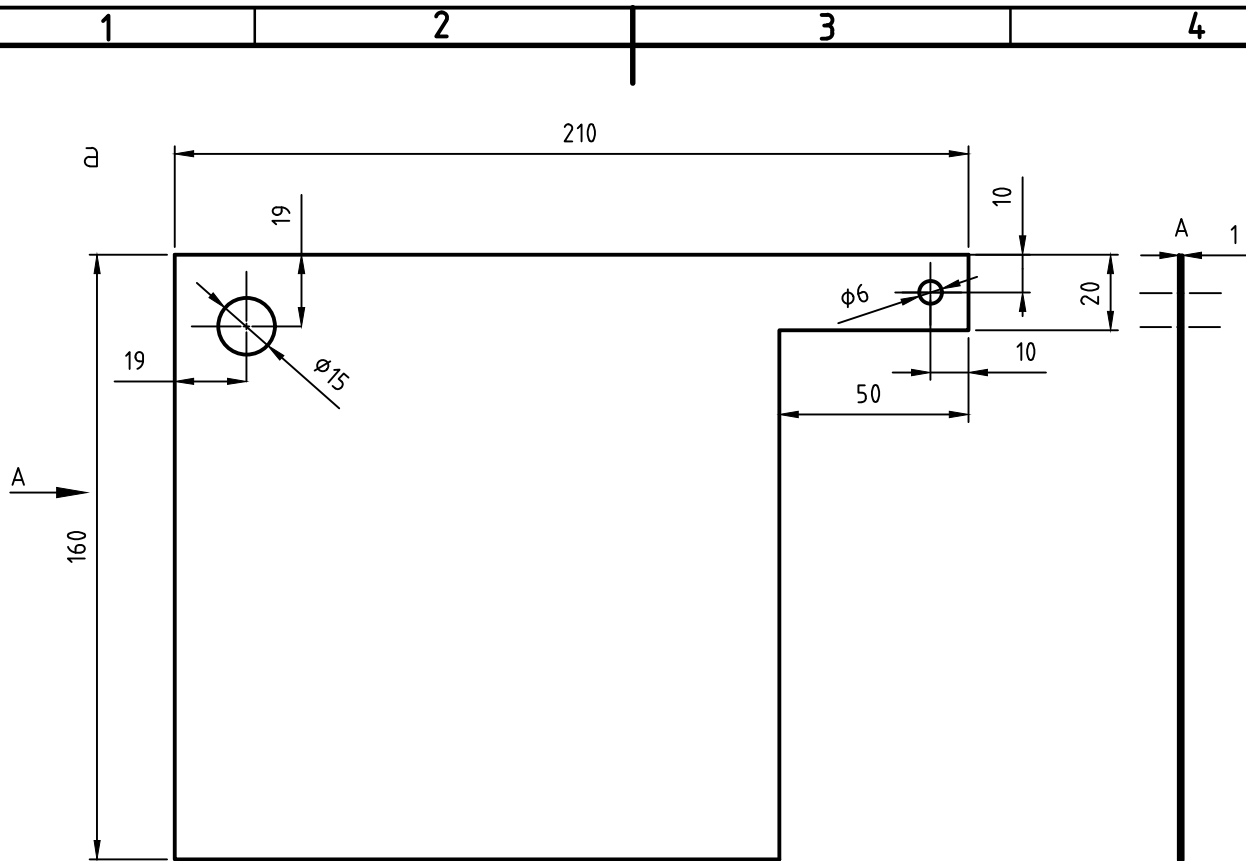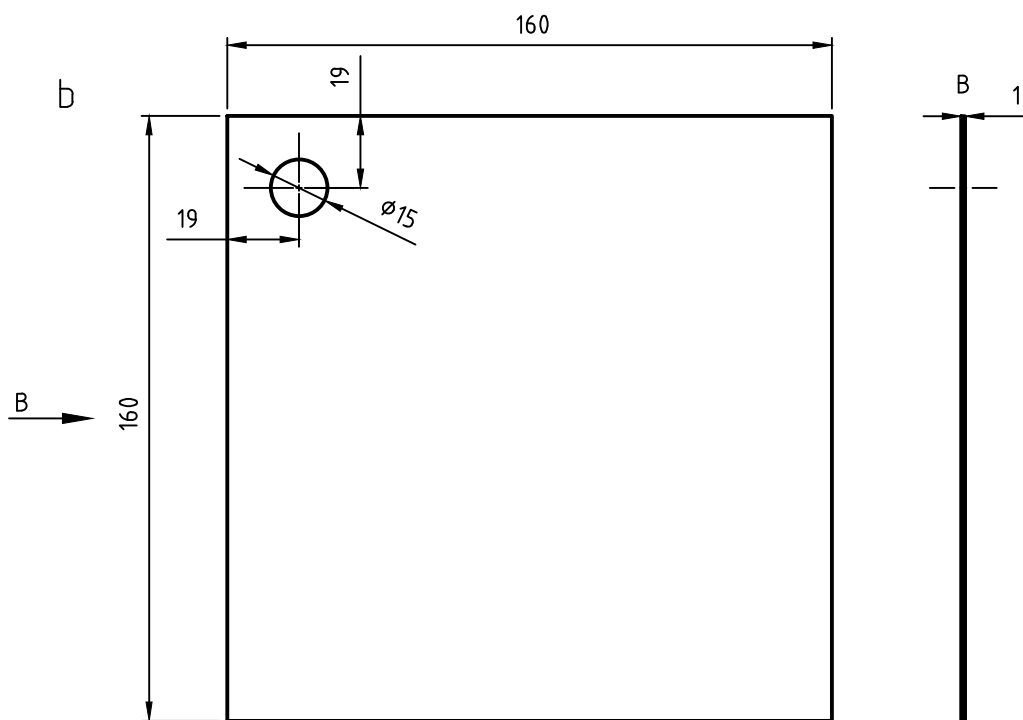

|                                                        |           |              |                                                       |                        |            |
|--------------------------------------------------------|-----------|--------------|-------------------------------------------------------|------------------------|------------|
| Low-cost dry-cell prototype for oxyhydrogen production |           |              | University of Évora                                   |                        |            |
| Created by Lisa Bunge                                  |           |              | Name: Drycell electrodes with pole (a) and simple (b) | Material: Steel 1.4571 |            |
| Date: 08-07-2021                                       | Revision: | Language: en | Quantity: 2 of a / 5 of b                             | Scale: 1:2             | Sheet: 2/5 |

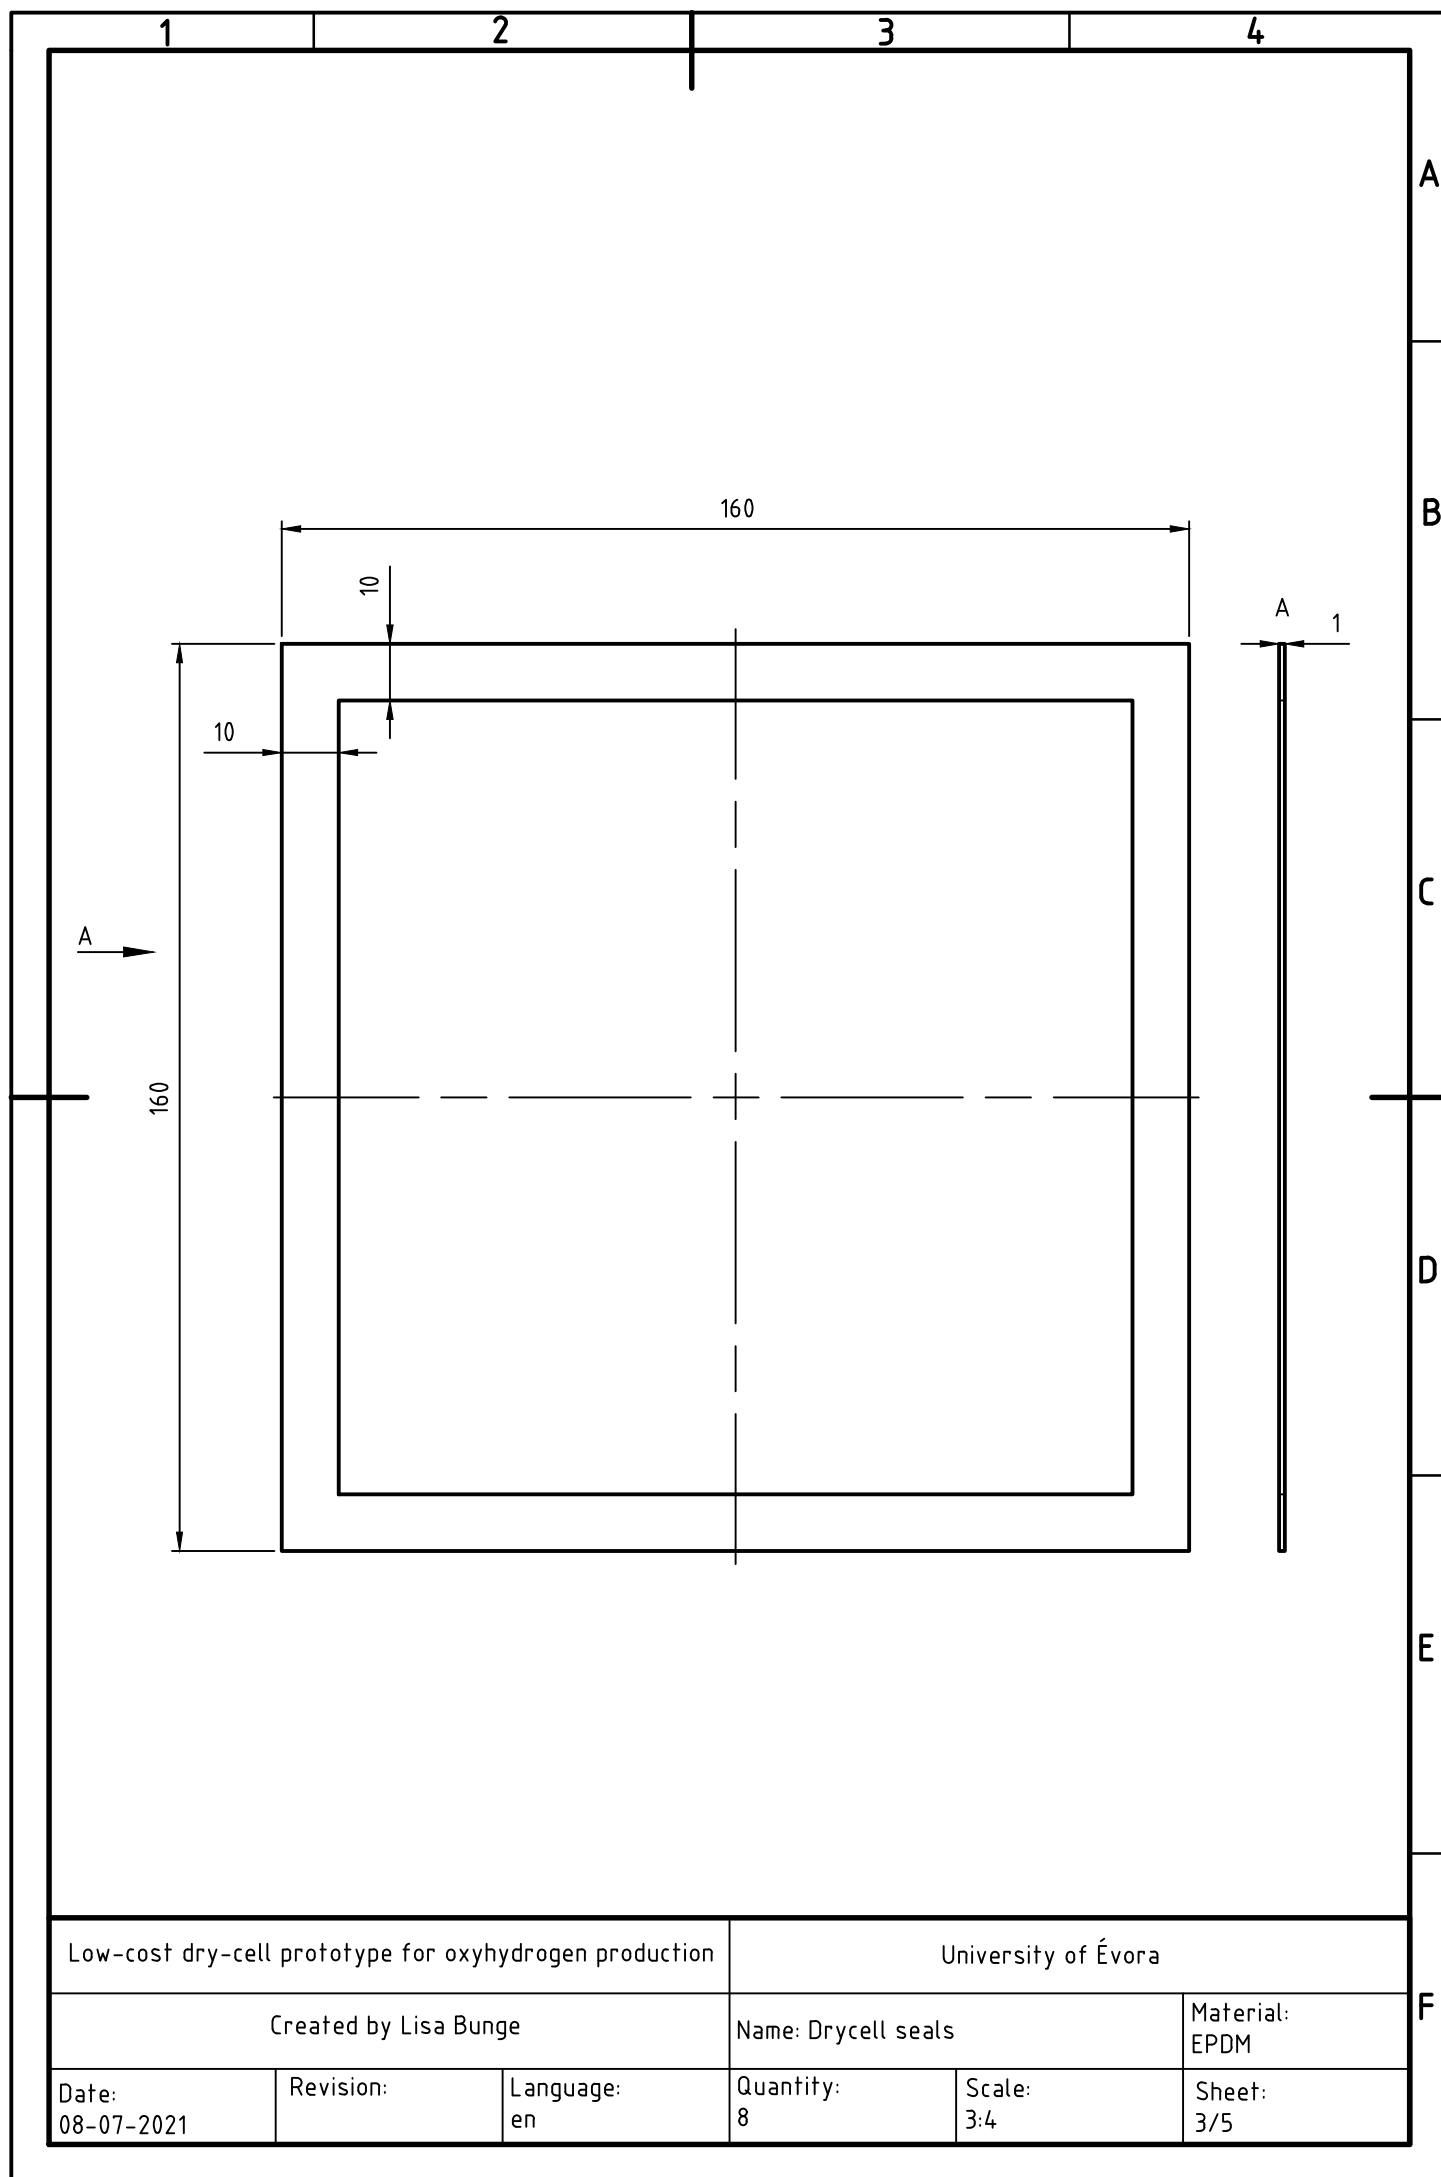

1

2

3

4

A

B

C

D

E

F

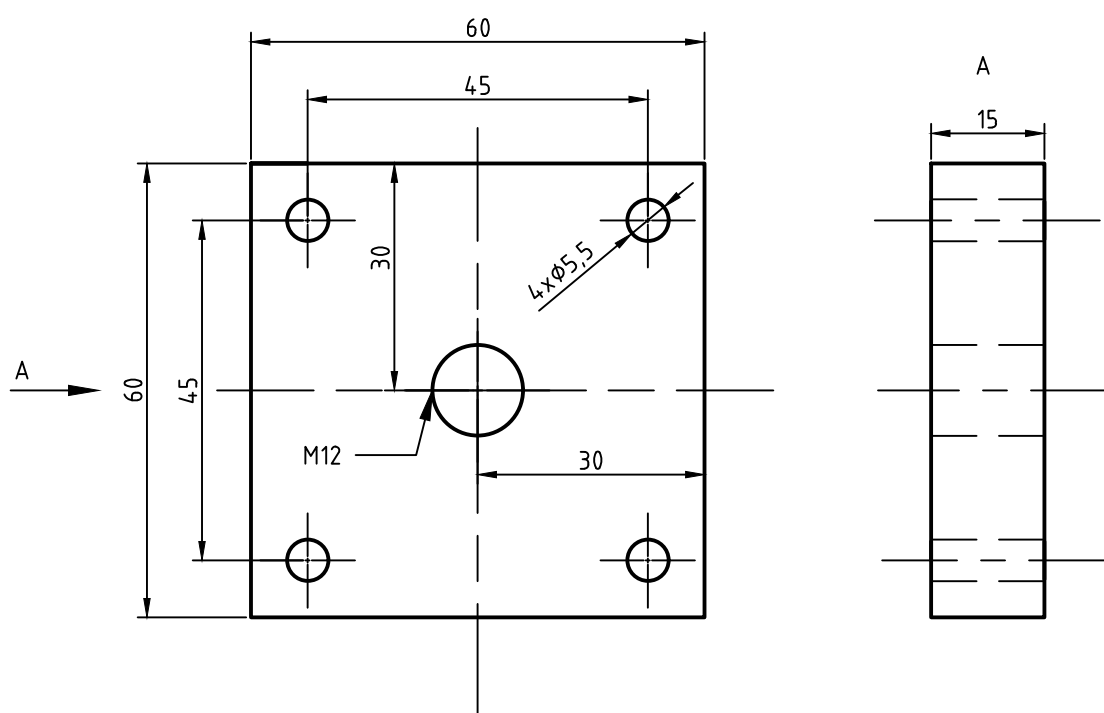

Low-cost dry-cell prototype for oxyhydrogen production

University of Évora

Created by Lisa Bunge

Name: Reservoir and bubbler bases

Material:  
PVCDate:  
08-07-2021

Revision:

Language:  
enQuantity:  
4Scale:  
1:1Sheet:  
4/5

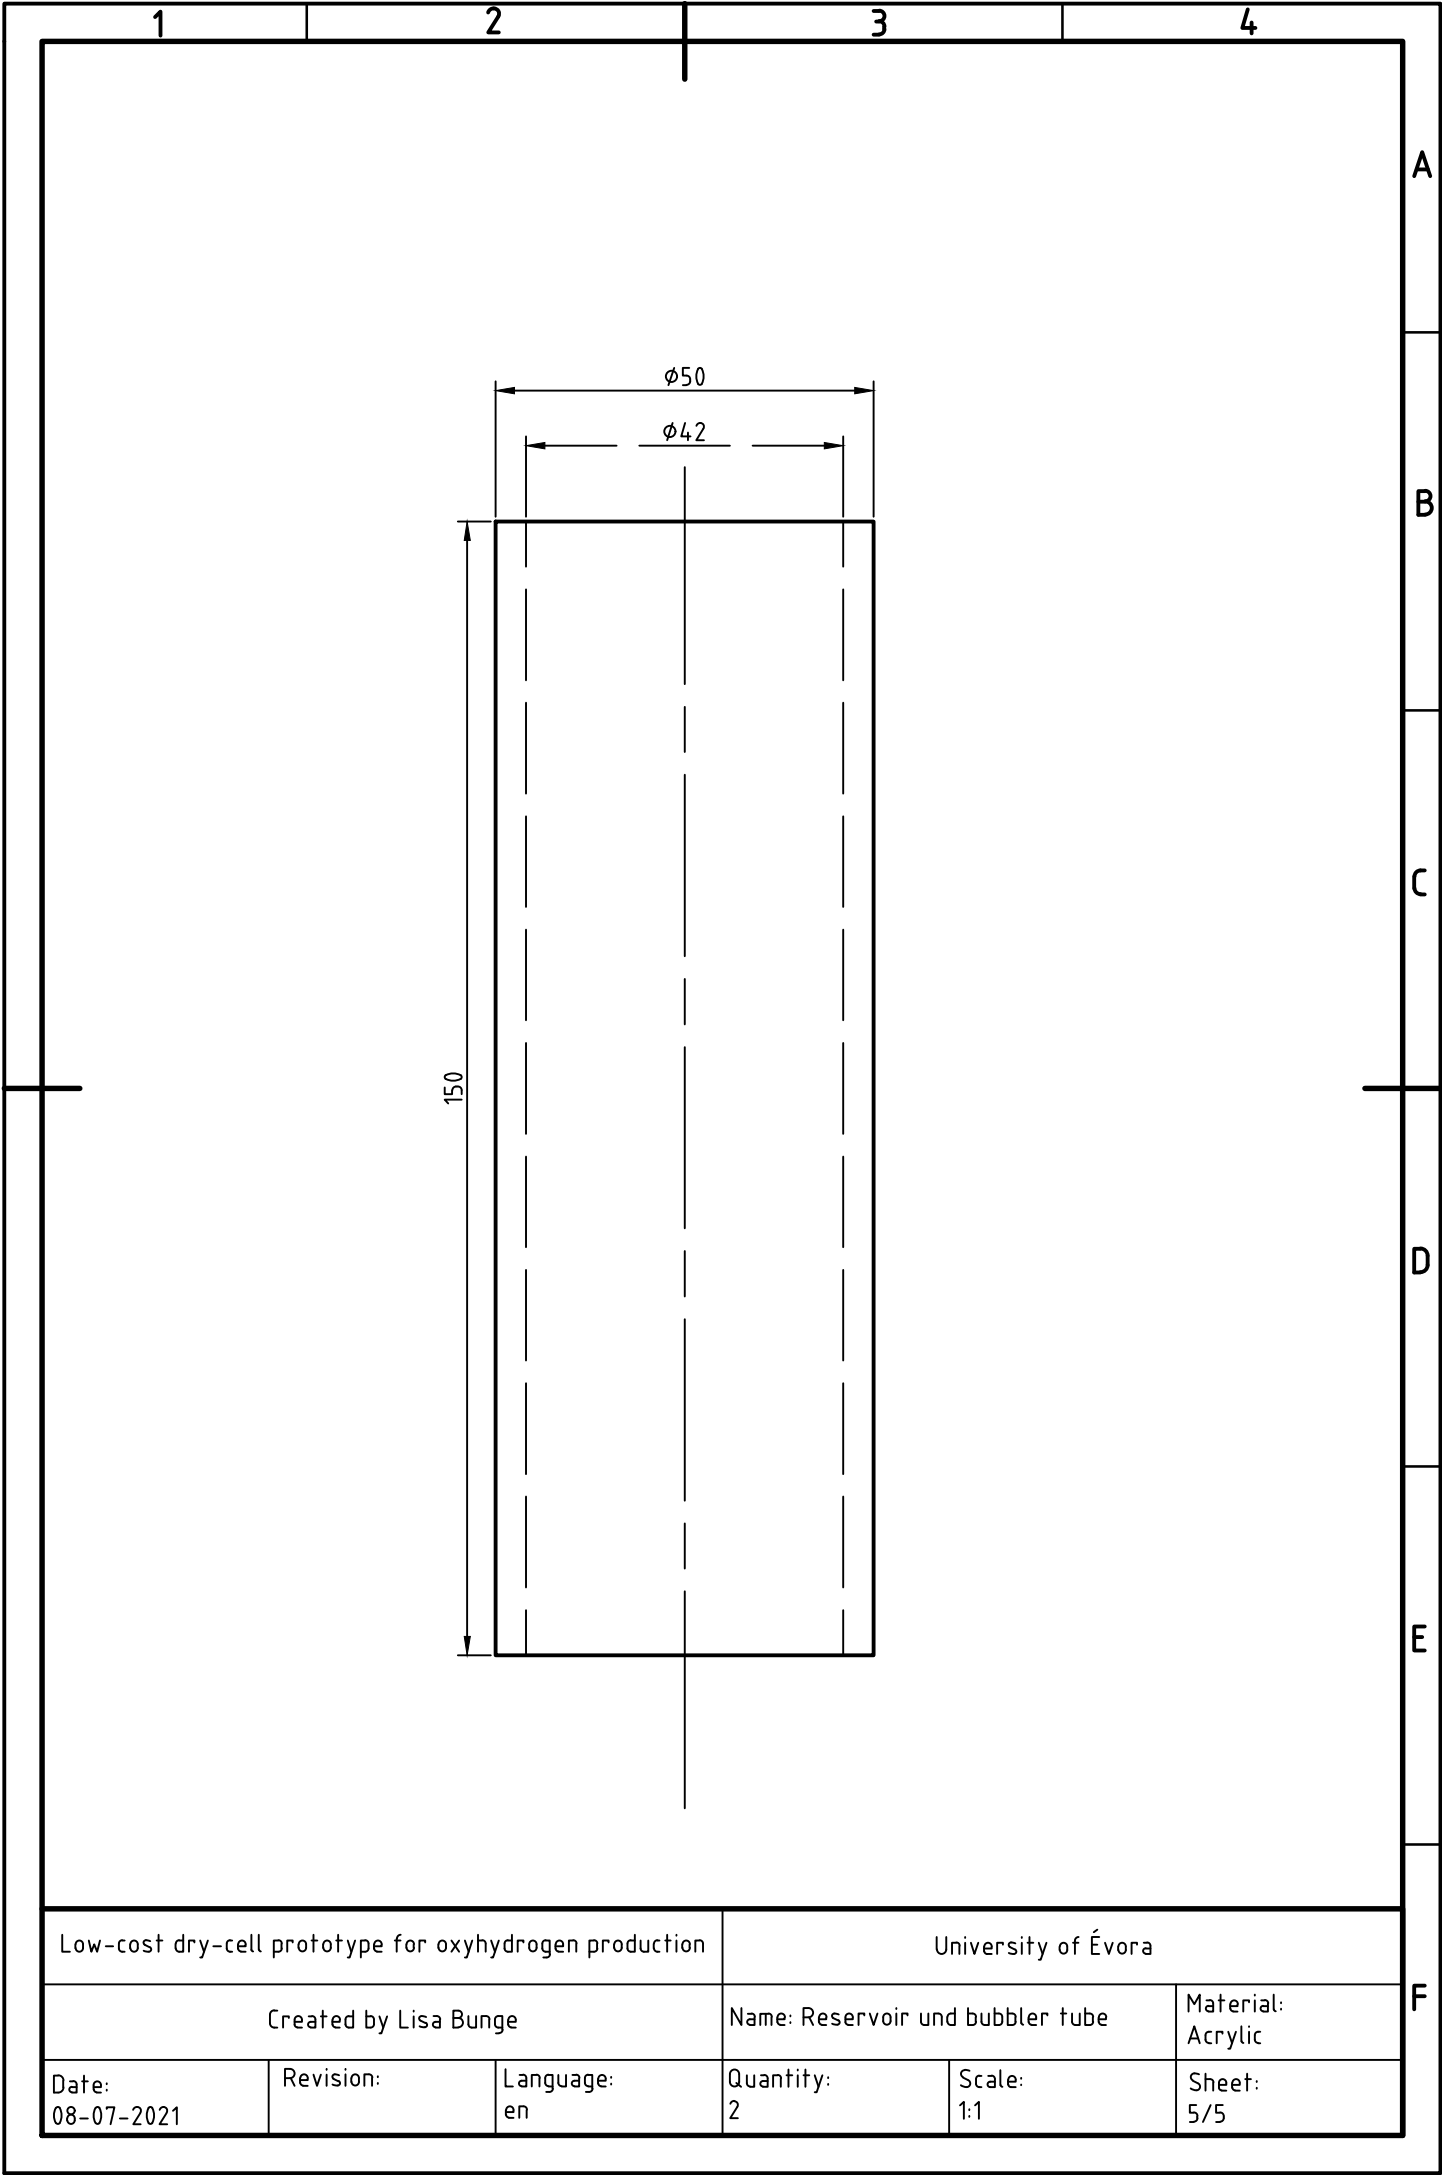

|                                                        |           |              |             |                                  |                   |
|--------------------------------------------------------|-----------|--------------|-------------|----------------------------------|-------------------|
| Low-cost dry-cell prototype for oxyhydrogen production |           |              |             | University of Évora              |                   |
| Created by Lisa Bunge                                  |           |              |             | Name: Reservoir und bubbler tube | Material: Acrylic |
| Date: 08-07-2021                                       | Revision: | Language: en | Quantity: 2 | Scale: 1:1                       | Sheet: 5/5        |
